# Supplementary material for: Copy-number variation of the neuronal glucose transporter gene SLC2A3 and age of onset in Huntington's disease
Source: PubMed Central journal article supplement (PMC4030768; doi:10.1093/hmg/ddu022), 2014-01-22
Supplement: supp_ddu022_ddu022supp_fig1.pdf [file supp_ddu022_ddu022supp_fig1.pdf]

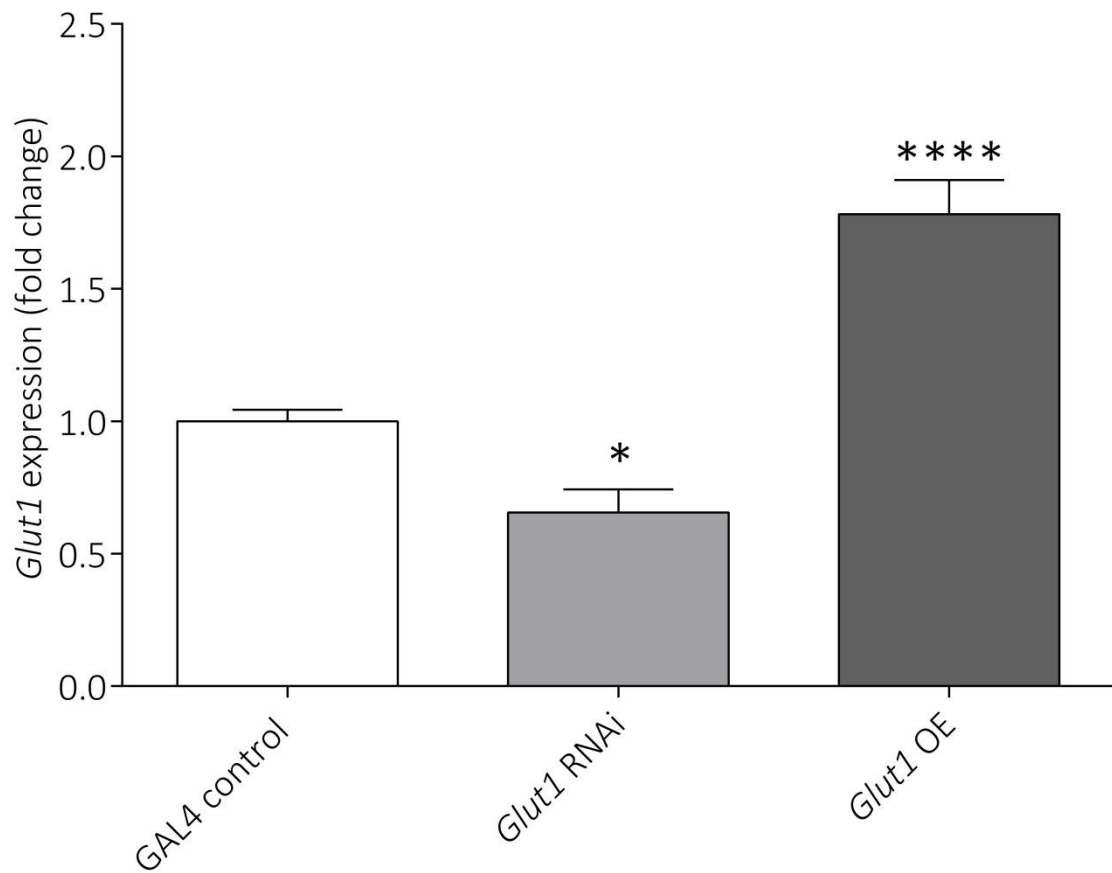

**Figure S1. Relative quantification of *Glut1* expression levels in the transgenic fly strains.**

Relative quantification of normalised  $\Delta Ct$  mean ( $\pm$  SEM) for the GAL4 control, *Glut1* RNAi and *Glut1* overexpressing (OE) flies.  $n \geq 30$  flies per each strain. Statistical comparisons by ANOVA and post hoc tests versus GAL4 control flies. (\*p value  $< 0.05$ ; \*\*\*\* p value  $< 0.0001$ ).
